# Supplementary material
Source: Springer Nature journal article supplement (http://www.springermedizin.de/resource/supplementary/12876_2008_273_MOESM1_ESM.pdf/9439066)

# Model of steatosis

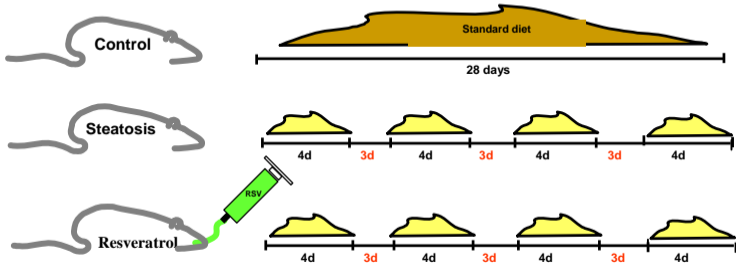

Supplement: MOESM1 [file 9439066]
